# Supplementary material for: Direct Precipitation of Lignin Nanoparticles from Wheat Straw Organosolv Liquors Using a Static Mixer
Source: PubMed Central journal article supplement (PMC7145315; doi:10.3390/molecules25061388), 2020-03-18
Supplement: molecules-25-01388-s001.pdf [file molecules-25-01388-s001.pdf]

1 Article

2 **Supplementary Materials:**

3 **Direct Precipitation of Lignin Nanoparticles from**  
4 **Wheat Straw Organosolv Liquors using a Static Mixer**

5 Stefan Beisl \*, Johannes Adamcyk and Anton Friedl

6 Institute of Chemical, Environmental and Bioscience Engineering, TU Wien, 1060 Vienna, Austria;

7 \* Correspondence: stefan.beisl@tuwien.ac.at; Tel.: +43-1-58801-166258

8

9

10 **Table S1.** Composition of the organosolv extract applied in the precipitation experiments

| Compound/Property                    | Value | Unit |
|--------------------------------------|-------|------|
| Ethanol                              | 511   | g/l  |
| Total Carbohydrates <sup>1</sup>     | 0.677 | g/l  |
| Monomeric Carbohydrates <sup>1</sup> | 0.201 | g/l  |
| Acetic Acid                          | 1.43  | g/l  |
| Acid Insoluble Lignin                | 5.53  | g/l  |
| Acid Soluble Lignin                  | 1.09  | g/l  |
| Density <sup>2</sup>                 | 0.901 | g/ml |
| Dry Matter <sup>3</sup>              | 1.57  | wt%  |

11 <sup>1</sup> Sum of arabinose, galactose, glucose, xylose and mannose concentrations; <sup>2</sup> at 25°C; <sup>3</sup>  
12 determined at 105°C

13

14

15 **Table S2.** Analysis of variance for fitted model for the carbohydrate and particle size response.

| Response      | Source     | df | Sum of squares | Mean squares | F value | P value | R <sup>2</sup> | Adj R <sup>2</sup> |
|---------------|------------|----|----------------|--------------|---------|---------|----------------|--------------------|
| Carbohydrates | Regression | 6  | 25.88          | 4.31327      | 37.25   | <0.0001 | 0.89           | 0.87               |
|               | Residual   | 27 | 3.126          | 0.1158       |         |         |                |                    |
|               | Total      | 33 | 29.01          |              |         |         |                |                    |
| Particle Size | Regression | 9  | 48153          | 5350.34      | 28.98   | <0.0001 | 0.92           | 0.88               |
|               | Residual   | 24 | 4431           | 184.6        |         |         |                |                    |
|               | Total      | 33 | 52585          |              |         |         |                |                    |

16

17

18

19

**Table S3.** Coefficient values of the fitted model for the carbohydrate and particle size response.

| Factor                     | Carbohydrate Content |                |         |         | Particles Size |                |         |         |
|----------------------------|----------------------|----------------|---------|---------|----------------|----------------|---------|---------|
|                            | Coefficient          | Standard Error | F value | P value | Coefficient    | Standard Error | F value | P value |
| Constant                   | 2.340                | 0.3718         |         |         | 304.4          | 15.94          |         |         |
| pH                         | 0.1954               | 0.1020         | 3.670   | 0.06590 | ns             |                |         |         |
| Ratio                      | ns                   |                |         |         | 20.96          | 10.33          | 4.120   | -0.054  |
| Flowrate                   | ns                   |                |         |         | -2.836         | 0.5183         | 29.93   | <0.0001 |
| pH <sup>2</sup>            | ns                   |                |         |         | ns             |                |         |         |
| pH × Ratio                 | ns                   |                |         |         | -15.39         | 4.521          | 11.59   | 0.0023  |
| pH × Flowrate              | -0.0008020           | 0.0003888      | 4.250   | 0.04890 | 0.5192         | 0.1973         | 6.930   | 0.015   |
| Ratio <sup>2</sup>         | ns                   |                |         |         | ns             |                |         |         |
| Ratio × Flowrate           | -0.002065            | 0.0004693      | 19.36   | 0.00020 | -0.05222       | 0.01510        | 11.96   | 0.0020  |
| Flowrate <sup>2</sup>      | ns                   |                |         |         | 0.007281       | 0.001018       | 51.17   | <0.0001 |
| pH <sup>2</sup> × Ratio    | -0.01348             | 0.0031679      | 18.10   | 0.00020 | 1.113          | 0.4496         | 6.130   | 0.021   |
| pH <sup>2</sup> × Flowrate | ns                   |                |         |         | -0.04888       | 0.01959        | 6.230   | 0.020   |
| pH × Ratio <sup>2</sup>    | 0.01031              | 0.0020067      | 26.41   | <0.0001 | 0.4435         | 0.1091         | 16.51   | 0.00040 |
| pH × Ratio × Flowrate      | 0.001                | 0.0001092      | 39.40   | <0.0001 | ns             |                |         |         |

20

not significant (ns)

21
